# Supplementary material for: Cardiolipin targets a dynamin-related protein to the nuclear membrane
Source: eLife. 2021 Mar 4;10:e64416. doi: 10.7554/eLife.64416 (PMC7946437; doi:10.7554/eLife.64416)
Supplement: Figure 4—source data 1. [file elife-64416-fig4-data1.xlsx]

## Sheet: Fig 4b (left)
		Phosphate released (nmol)
		Drp6	I553M
	Replicate 1	1.6	1.9
	Replicate 2	1.68	1.78
	Replicate 3	1.8	1.85
	mean	1.69333	1.84333
	SD	0.0821922	0.0492161

## Sheet: Fig 4b (right)
					Drp6						Drp6-I553M
		Time (min)		Replicate 1	Replicate 2	Replicate3	Mean	SD		Replicate 1	Replicate 2	Replicate3	Mean	SD
		0		0	0	0	0	0		0	0	0	0
		5		0.426	0.438	0.39	0.418	0.0203961		0.351	0.38	0.35	0.360333	0.0170392
		10		0.698	0.73	0.684	0.704	0.0192527		0.637	0.638	0.7	0.658333	0.0360879
		20		0.952	1.32	1	1.09067	0.0543415		1.014	1.1	1.195	1.103	0.0905373

## Sheet: Fig 4c
Phosphate released					WT							I553M
nmol/10min/micromole protein
			GTP (uM)	Replicate 1	Replicate 2	Replicate 3	Mean	SD		GTP (uM)	Replicate 1	Replicate 2	Replicate 3	Mean	SD
			0	0	0	0	0	0		0	0	0	0	0	0
			100	0.18	0.2	0.193	0.191	0.00828654		100	0.129	0.145	0.141	0.138333	0.00679869
			200	0.413	0.427	0.41	0.416667	0.0074087		200	0.283	0.295	0.291	0.289667	0.00498888
			300	0.596	0.58	0.594	0.59	0.00711805		300	0.4	0.37	0.42	0.396667	0.020548
			400	0.68	0.686	0.66	0.675333	0.0111156		400	0.47	0.47	0.4	0.446667	0.0329983
			500	0.755	0.734	0.73	0.739667	0.0109646		500	0.545	0.525	0.545	0.538333	0.00942809
			600	0.734	0.74	0.705	0.726333	0.0152825		600	0.57	0.575	0.53	0.558333	0.0201384
			800	0.778	0.745	0.762	0.761667	0.0134743		800	0.615	0.64	0.62	0.625	0.0108012
			1000	0.77	0.75	0.778	0.766	0.0117757		1000	0.67	0.658	0.647	0.658333	0.00939267
			1200	0.783	0.762	0.768	0.771	0.00883176		1200	0.695	0.7	0.685	0.693333	0.0062361
			1400	0.787	0.76	0.74	0.762333	0.0192585		1400	0.735	0.69	0.7	0.708333	0.0192931
			1600	0.75	0.74	0.717	0.735667	0.0138163		1600	0.713	0.697	0.703	0.704333	0.00659966
			1800	0.75	0.742	0.745	0.745667	0.00329983		1800	0.71	0.7	0.685	0.698333	0.010274

## Sheet: Fig 4d
		Elution volume	Drp6	Drp6-I553M
		(ml)	mAU	mAU
		0	-5.97	-0.0025806
		0.03	0	0.146452
		0.07	0.07	0.159355
		0.1	0.08	0.0954839
		0.13	0.01	0.06
		0.17	0.07	0.121936
		0.2	0.48	1.88129
		0.23	0.67	8.18516
		0.27	0.64	9.7271
		0.3	0.58	9.88258
		0.33	0.48	6.31613
		0.37	0.39	3.99097
		0.4	0.38	2.69742
		0.43	0.32	1.96774
		0.47	0.22	1.52968
		0.5	0.25	1.11806
		0.53	0.02	0.975484
		0.57	0.05	0.983871
		0.6	-0.02	0.807097
		0.63	-0.04	0.670968
		0.67	-0.08	0.565806
		0.7	0.01	0.472258
		0.73	0.03	0.448387
		0.77	-0.1	0.407742
		0.8	0.02	0.354839
		0.83	0.04	0.30129
		0.87	-0.06	0.376129
		0.9	-0.06	0.316129
		0.93	-0.01	0.223226
		0.97	0.04	0.184516
		1	0.02	0.213548
		1.03	0.05	0.190968
		1.07	-0.05	0.252258
		1.1	0.09	0.139355
		1.13	0.03	0.166452
		1.16	-0.07	0.190323
		1.2	-0.06	0.173548
		1.23	0.28	0.133548
		1.26	0.26	0.105806
		1.3	0.16	0.0464516
		1.33	0.22	0.150323
		1.36	0.16	0.205161
		1.4	0.04	0.24129
		1.43	0.06	0.229677
		1.46	0.27	0.219355
		1.5	0.09	0.207742
		1.53	0.05	0.181935
		1.56	-0.01	0.250968
		1.6	-0.08	0.199355
		1.63	-0.06	0.173548
		1.66	-0.06	0.111613
		1.7	-0.07	0.04
		1.73	0.03	0.083871
		1.76	-0.16	0.0148387
		1.8	-0.07	0.063871
		1.83	0.16	0.0483871
		1.86	0.03	0.063871
		1.9	-0.07	0.0083871
		1.93	-0.13	0.0419355
		1.96	-0.03	0.0548387
		2	-0.1	-0.0077419
		2.03	-0.08	-0.0006452
		2.06	0.06	-0.0135484
		2.1	0.08	0.0451613
		2.13	0.03	0.0187097
		2.16	-0.1	0.117419
		2.2	-0.04	0.0051613
		2.23	0.15	0.0845161
		2.26	0.3	0.13871
		2.3	0.2	0.0141935
		2.33	0.16	0.0154839
		2.36	0.26	0.0154839
		2.4	0.21	0.108387
		2.43	0.15	0.114194
		2.46	0.22	0.0851613
		2.5	0.17	0.0574194
		2.53	0.09	0.0767742
		2.56	-0.05	0.083871
		2.6	-0.09	0.102581
		2.63	-0.12	0.149677
		2.66	-0.08	0.106452
		2.7	-0.1	0.0922581
		2.73	-0.09	0.0135484
		2.76	-0.13	0.0464516
		2.8	0.02	0.0541935
		2.83	-0.09	0.0258065
		2.86	-0.04	-0.063871
		2.9	-0.14	-0.0425806
		2.93	-0.11	0.0006452
		2.96	-0.11	0.0174194
		3	-0.05	-0.0193548
		3.03	-0.13	-0.0116129
		3.06	-0.15	0.016129
		3.1	-0.09	-0.0212903
		3.13	-0.08	-0.0374194
		3.16	-0.03	0.0290323
		3.2	-0.15	-0.016129
		3.23	-0.05	-0.0025806
		3.26	0.04	0.0187097
		3.3	0.15	0.170323
		3.33	0.13	0.469677
		3.36	0.05	0.395484
		3.39	0.02	0.546452
		3.43	0.08	0.343226
		3.46	0.14	0.297419
		3.49	0.08	0.183871
		3.53	0.04	0.190968
		3.56	-0.06	0.212903
		3.59	-0.19	0.210968
		3.63	-0.11	0.207097
		3.66	-0.17	0.176129
		3.69	-0.14	0.10129
		3.73	-0.08	0.0896774
		3.76	-0.18	0.0703226
		3.79	-0.24	-0.003871
		3.83	-0.14	-0.0006452
		3.86	-0.11	-0.063871
		3.89	-0.2	-0.0277419
		3.93	-0.22	-0.0077419
		3.96	-0.22	0.0141935
		3.99	-0.2	-0.0393548
		4.03	-0.21	-0.0741935
		4.06	-0.2	-0.0258065
		4.09	-0.16	-0.0341935
		4.13	-0.12	-0.0503226
		4.16	-0.17	-0.0451613
		4.19	-0.17	-0.0432258
		4.23	-0.21	-0.0470968
		4.26	-0.22	0.0619355
		4.29	-0.02	0.0625806
		4.33	0.06	0.02
		4.36	0.07	0.0425806
		4.39	0.06	-0.0277419
		4.43	-0.16	0.0309677
		4.46	-0.07	0.0729032
		4.49	0.07	0.0432258
		4.53	0	0.0148387
		4.56	0.07	0.109677
		4.59	-0.17	0.0296774
		4.63	-0.17	0.0122581
		4.66	-0.26	0.0509677
		4.69	-0.15	0.130323
		4.73	-0.18	0.261935
		4.76	-0.18	0.356129
		4.79	-0.21	0.273548
		4.83	-0.21	0.179355
		4.86	-0.26	0.0535484
		4.89	-0.19	0.0619355
		4.93	-0.28	-0.0135484
		4.96	-0.21	0.063871
		4.99	-0.25	0.036129
		5.03	-0.23	0.0367742
		5.06	-0.27	0.0251613
		5.09	-0.23	0.023871
		5.13	-0.19	-0.0025806
		5.16	-0.16	-0.0264516
		5.19	-0.2	-0.0212903
		5.23	-0.25	0.0232258
		5.26	-0.28	0.0141935
		5.29	-0.29	0.0367742
		5.33	-0.05	-0.0064516
		5.36	0.03	0.0045161
		5.39	-0.13	-0.0090323
		5.43	-0.05	-0.0206452
		5.46	-0.06	0.0716129
		5.49	-0.03	0.149677
		5.52	-0.07	0.14129
		5.56	-0.08	0.100645
		5.59	-0.13	0.120645
		5.62	-0.2	0.141935
		5.66	-0.2	0.112903
		5.69	-0.21	0.105806
		5.72	-0.24	0.0735484
		5.76	-0.31	0.0580645
		5.79	-0.15	-0.0283871
		5.82	-0.28	-0.0116129
		5.86	-0.3	-0.0122581
		5.89	-0.19	-0.0522581
		5.92	-0.23	-0.103226
		5.96	-0.17	-0.0341935
		5.99	-0.25	0.043871
		6.02	-0.21	0.0664516
		6.06	-0.18	0.0283871
		6.09	-0.26	-0.0283871
		6.12	-0.14	0.0141935
		6.16	-0.22	0.0903226
		6.19	-0.22	0.10129
		6.22	-0.25	0.150323
		6.26	-0.22	0.173548
		6.29	-0.2	0.172903
		6.32	-0.23	0.320645
		6.36	0.1	0.398064
		6.39	0.06	0.392903
		6.42	0.01	0.481936
		6.46	0.11	0.613548
		6.49	0.21	0.723226
		6.52	0.18	0.908387
		6.56	0.23	1.05097
		6.59	0.25	1.21806
		6.62	0.3	1.4271
		6.66	0.41	1.69226
		6.69	0.5	1.97161
		6.72	0.64	2.38387
		6.76	0.86	2.75806
		6.79	1.16	3.24452
		6.82	1.45	3.7929
		6.86	1.82	4.38774
		6.89	2.22	5.20839
		6.92	3.04	6.12516
		6.96	3.67	7.29806
		6.99	4.6	8.64839
		7.02	5.59	10.4265
		7.06	6.64	12.4774
		7.09	8.3	15.1735
		7.12	10	18.4587
		7.16	12.11	22.4729
		7.19	14.87	27.3677
		7.22	18.28	33.129
		7.26	22.6	40.0477
		7.29	28.17	47.4794
		7.32	35.04	56.0974
		7.36	43.51	64.789
		7.39	52.92	74.4781
		7.42	63.22	84.0058
		7.46	74.09	93.8581
		7.49	85.12	102.951
		7.52	95.74	111.923
		7.56	105.19	119.22
		7.59	113.52	125.566
		7.62	120.22	130.09
		7.66	125.25	132.835
		7.69	128.28	133.738
		7.72	129.29	132.815
		7.75	128.17	130.152
		7.79	124.92	125.73
		7.82	119.95	120.103
		7.85	113.18	113.166
		7.89	105.57	105.436
		7.92	97.22	97.1968
		7.95	88.64	88.5077
		7.99	80.31	79.8374
		8.02	72.37	71.1923
		8.05	65.03	63.38
		8.09	58.71	55.8535
		8.12	53.08	49.5265
		8.15	48.23	43.8174
		8.19	44.27	39.031
		8.22	40.85	34.8845
		8.25	37.72	31.611
		8.29	35.19	28.8194
		8.32	33.03	26.631
		8.35	31.03	24.6465
		8.39	29.65	23.0865
		8.42	28.16	21.6845
		8.45	26.8	20.4535
		8.49	25.72	19.4058
		8.52	24.64	18.529
		8.55	23.73	17.789
		8.59	22.91	17.031
		8.62	22.17	16.4277
		8.65	21.42	15.7942
		8.69	20.63	15.2413
		8.72	20.12	14.7303
		8.75	19.69	14.4303
		8.79	19.15	13.9213
		8.82	18.71	13.6174
		8.85	18.28	13.2394
		8.89	17.93	12.9245
		8.92	17.58	12.7006
		8.95	17.3	12.3974
		8.99	16.94	12.2671
		9.02	16.72	11.9806
		9.05	16.43	11.8845
		9.09	16.25	11.6168
		9.12	16.02	11.38
		9.15	15.9	11.3903
		9.19	15.71	11.1839
		9.22	15.62	11.0968
		9.25	15.4	10.989
		9.29	15.27	10.8045
		9.32	15.16	10.6923
		9.35	15.04	10.6084
		9.39	14.89	10.5639
		9.42	14.81	10.5097
		9.45	14.73	10.3019
		9.49	14.58	10.1368
		9.52	14.56	10.1632
		9.55	14.46	10.151
		9.59	14.28	10.091
		9.62	14.24	9.98516
		9.65	14.27	9.86129
		9.69	14.09	9.77871
		9.72	14.1	9.68516
		9.75	14	9.63032
		9.79	13.98	9.50129
		9.82	13.9	9.38
		9.85	13.98	9.24968
		9.89	13.91	9.09742
		9.92	13.9	9.06387
		9.95	14.01	8.97355
		9.98	14.03	8.93742
		10.02	14.12	8.96516
		10.05	14.28	8.93484
		10.08	14.4	8.9071
		10.12	14.62	8.89484
		10.15	14.94	8.92
		10.18	15.22	8.99097
		10.22	15.54	9.02516
		10.25	15.94	9.17032
		10.28	16.62	9.28194
		10.32	17.23	9.35161
		10.35	17.83	9.61355
		10.38	18.64	9.81355
		10.42	19.43	10.0374
		10.45	20.29	10.3529
		10.48	21.32	10.6226
		10.52	22.37	10.9206
		10.55	23.3	11.3458
		10.58	24.26	11.7239
		10.62	25.18	12.1239
		10.65	26.14	12.4097
		10.68	26.89	12.7865
		10.72	27.55	13.1548
		10.75	28.24	13.4568
		10.78	28.8	13.7503
		10.82	29.19	13.9542
		10.85	29.55	14.1581
		10.88	29.65	14.1877
		10.92	29.62	14.36
		10.95	29.6	14.3174
		10.98	29.38	14.3445
		11.02	29.17	14.2929
		11.05	28.74	14.1206
		11.08	28.28	14.0174
		11.12	27.78	13.7948
		11.15	27.12	13.629
		11.18	26.48	13.3277
		11.22	26.16	13.1484
		11.25	25.5	12.8039
		11.28	25.03	12.591
		11.32	24.43	12.3077
		11.35	23.91	12.1168
		11.38	23.43	11.8271
		11.42	23.02	11.5942
		11.45	22.6	11.3168
		11.48	22.21	11.0858
		11.52	21.9	10.8981
		11.55	21.55	10.6432
		11.58	21.23	10.5277
		11.62	21.07	10.4226
		11.65	20.86	10.2226
		11.68	20.51	10.0413
		11.72	20.27	9.89871
		11.75	20.17	9.79097
		11.78	19.96	9.73161
		11.82	19.84	9.51161
		11.85	19.72	9.45419
		11.88	19.64	9.27161
		11.92	19.72	9.18516
		11.95	19.65	9.12516
		11.98	19.74	9.09677
		12.02	19.65	9.03613
		12.05	19.58	9.00516
		12.08	19.75	9.02903
		12.11	19.88	9.03355
		12.15	19.91	9.10645
		12.18	19.92	9.11032
		12.21	20.11	9.13161
		12.25	20.12	9.21484
		12.28	20.22	9.26581
		12.31	20.23	9.37548
		12.35	20.09	9.45742
		12.38	20.22	9.41484
		12.41	20.14	9.54065
		12.45	20.09	9.63806
		12.48	20.15	9.72065
		12.51	20.13	9.64774
		12.55	20.05	9.7871
		12.58	19.97	9.82903
		12.61	19.89	9.87677
		12.65	19.58	9.98839
		12.68	19.59	9.95548
		12.71	19.3	9.9271
		12.75	19.2	10.0368
		12.78	18.97	9.98258
		12.81	18.79	10.0071
		12.85	18.65	10.0187
		12.88	18.48	9.8929
		12.91	18.35	9.88516
		12.95	18.25	9.94194
		12.98	18.19	9.81806
		13.01	18.04	9.81806
		13.05	17.84	9.90065
		13.08	17.94	9.81226
		13.11	17.88	9.77806
		13.15	18.01	9.9271
		13.18	17.82	9.76129
		13.21	17.85	9.94258
		13.25	17.85	9.86194
		13.28	17.86	9.78645
		13.31	17.92	9.79355
		13.35	17.88	9.77935
		13.38	17.76	9.76774
		13.41	17.74	9.75161
		13.45	17.58	9.76968
		13.48	17.36	9.70581
		13.51	17.19	9.59871
		13.55	17.07	9.50516
		13.58	16.76	9.45613
		13.61	16.37	9.16452
		13.65	16.17	9.20581
		13.68	15.78	9.0329
		13.71	15.38	8.85935
		13.75	15.09	8.73871
		13.78	14.62	8.45613
		13.81	14.29	8.26129
		13.85	13.96	8.09226
		13.88	13.61	7.86774
		13.91	13.34	7.67226
		13.95	13.08	7.47226
		13.98	12.79	7.28839
		14.01	12.5	7.09742
		14.05	12.43	6.92194
		14.08	12.19	6.81613
		14.11	12.08	6.77548
		14.15	11.95	6.66129
		14.18	11.76	6.67419
		14.21	11.66	6.60516
		14.25	11.72	6.54581
		14.28	11.7	6.53161
		14.31	11.68	6.50903
		14.34	11.7	6.49806
		14.38	11.63	6.51548
		14.41	11.68	6.52581
		14.44	11.88	6.53484
		14.48	11.83	6.59097
		14.51	12.07	6.53871
		14.54	12.15	6.64903
		14.58	12.22	6.65484
		14.61	12.27	6.70452
		14.64	12.43	6.76516
		14.68	12.48	6.87419
		14.71	12.58	6.9129
		14.74	12.76	7.02129
		14.78	12.81	7.00129
		14.81	12.93	6.99226
		14.84	13.03	7.13355
		14.88	13.14	7.21806
		14.91	13.35	7.30258
		14.94	13.48	7.50968
		14.98	13.7	7.60387
		15.01	13.95	7.71355
		15.04	14.2	7.77484
		15.08	14.49	7.99935
		15.11	14.79	8.15419
		15.14	15.03	8.33742
		15.18	15.39	8.5471
		15.21	15.6	8.68839
		15.24	15.93	8.86258
		15.28	16.23	9.07355
		15.31	16.42	9.21806
		15.34	16.68	9.31742
		15.38	16.91	9.48645
		15.41	17.09	9.53613
		15.44	17.16	9.60452
		15.48	17.26	9.62968
		15.51	17.34	9.69806
		15.54	17.4	9.64323
		15.58	17.38	9.49935
		15.61	17.28	9.39871
		15.64	17.13	9.30452
		15.68	17.02	9.30452
		15.71	16.87	9.19097
		15.74	16.9	9.08968
		15.78	16.6	8.95935
		15.81	16.51	8.88516
		15.84	16.33	8.94452
		15.88	15.99	8.96581
		15.91	15.92	8.73677
		15.94	15.79	8.42258
		15.98	15.69	8.21613
		16.01	15.45	8.02258
		16.04	15.16	7.97355
		16.08	15.06	7.77484
		16.11	14.89	7.63677
		16.14	14.8	7.62258
		16.18	14.53	7.54839
		16.21	14.49	7.50323
		16.24	14.24	7.4329
		16.28	14.27	7.36774
		16.31	14.21	7.39097
		16.34	14.22	7.38516
		16.38	14.22	7.32581
		16.41	14.17	7.30194
		16.44	14.13	7.31613
		16.48	14.08	7.25355
		16.51	14.31	7.32258
		16.54	14.28	7.40774
		16.57	14.57	7.39419
		16.61	14.61	7.38194
		16.64	14.7	7.38129
		16.67	14.8	7.30258
		16.71	14.72	7.37355
		16.74	14.49	7.45677
		16.77	14.59	7.3329
		16.81	14.45	7.28
		16.84	14.22	7.29548
		16.87	13.78	7.11355
		16.91	13.6	7.02774
		16.94	13.32	6.9871
		16.97	12.99	6.74387
		17.01	12.64	6.62452
		17.04	12.32	6.54516
		17.07	11.94	6.28387
		17.11	11.48	6.17226
		17.14	11.19	6.00581
		17.17	10.79	5.80903
		17.21	10.4	5.63161
		17.24	10.05	5.47806
		17.27	9.63	5.29742
		17.31	9.42	5.14323
		17.34	9.28	5.09742
		17.37	8.84	4.9129
		17.41	8.75	4.73677
		17.44	8.56	4.71097
		17.47	8.32	4.53613
		17.51	8.22	4.38581
		17.54	8.06	4.36645
		17.57	7.98	4.28452
		17.61	7.9	4.18129
		17.64	7.85	4.12
		17.67	7.67	4.07484
		17.71	7.58	4.04516
		17.74	7.6	4.09419
		17.77	7.56	4.09613
		17.81	7.55	4.06774
		17.84	7.64	4.07226
		17.87	7.65	4.01097
		17.91	7.59	4.08258
		17.94	7.62	4.03806
		17.97	7.6	4.07935
		18.01	7.66	4.03742
		18.04	7.66	3.97871
		18.07	7.73	4.01097
		18.11	7.7	4.01935
		18.14	7.93	4.08387
		18.17	7.84	4.09613
		18.21	7.96	4.17226
		18.24	8.05	4.19677
		18.27	8.02	4.24258
		18.31	8.15	4.29226
		18.34	8.24	4.36839
		18.37	8.51	4.41161
		18.41	9.09	4.42839
		18.44	9.19	4.49419
		18.47	9.19	4.52323
		18.51	8.87	4.59484
		18.54	8.8	4.67419
		18.57	8.81	4.78387
		18.61	8.77	4.8529
		18.64	8.87	4.8
		18.67	8.88	4.79419
		18.71	8.97	4.89032
		18.74	8.92	4.92645
		18.77	8.96	5.00323
		18.8	8.91	5.0071
		18.84	8.87	4.9929
		18.87	8.86	5.05032
		18.9	8.78	5.06774
		18.94	8.7	5.01935
		18.97	8.71	5.03935
		19	8.75	5.03419
		19.04	8.69	5.03806
		19.07	8.55	5.02903
		19.1	8.59	4.97419
		19.14	8.54	5.00194
		19.17	8.41	4.95419
		19.2	8.41	4.98774
		19.24	8.44	4.89161
		19.27	8.32	4.85871
		19.3	8.29	4.85355
		19.34	8.26	4.78258
		19.37	8.21	4.76
		19.4	8.22	4.69935
		19.44	8.18	4.65935
		19.47	8.03	4.69613
		19.5	8.09	4.71226
		19.54	8.05	4.63355
		19.57	8.25	4.61226
		19.6	8.05	4.64065
		19.64	8.02	4.56516
		19.67	8.06	4.57677
		19.7	7.93	4.54065
		19.74	7.93	4.50452
		19.77	7.85	4.5271
		19.8	7.91	4.52452
		19.84	7.82	4.5329
		19.87	7.74	4.46645
		19.9	7.68	4.41935
		19.94	7.65	4.43806
		19.97	7.76	4.35419
		20	7.7	4.28968
		20.04	7.65	4.15355
		20.07	7.71	4.02258
		20.1	7.81	3.98194
		20.14	7.87	3.9329
		20.17	7.85	3.78323
		20.2	7.9	3.82645
		20.24	7.94	3.68839
		20.27	8.13	3.69355
		20.3	8.2	3.6
		20.34	8.21	3.58839
		20.37	8.15	3.55032
		20.4	8.25	3.49871
		20.44	8.08	3.42065
		20.47	7.93	3.45742
		20.5	7.78	3.38129
		20.54	7.5	3.41742
		20.57	7.14	3.33548
		20.6	6.73	3.36645
		20.64	6.25	3.40258
		20.67	6	3.44129
		20.7	5.64	3.36839
		20.74	5.27	3.47226
		20.77	5.01	3.37806
		20.8	4.73	3.50774
		20.84	4.56	3.5471
		20.87	4.55	3.53355
		20.9	4.49	3.54129
		20.93	4.3	3.59871
		20.97	4.37	3.56
		21	4.36	3.56774
		21.03	4.42	3.71355
		21.07	4.39	3.65161
		21.1	4.68	3.72581
		21.13	4.74	3.65871
		21.17	4.93	3.72581
		21.2	5.01	3.78452
		21.23	5.13	3.74387
		21.27	5.21	3.82581
		21.3	5.42	3.74968
		21.33	5.64	3.84516
		21.37	5.91	3.81484
		21.4	5.96	3.85484
		21.43	6.09	3.8729
		21.47	6.09	3.90839
		21.5	6.19	3.80258
		21.53	6.27	3.88774
		21.57	6.24	3.79097
		21.6	6.26	3.77871
		21.63	6.22	3.6729
		21.67	6.23	3.65677
		21.7	6.26	3.54516
		21.73	6.36	3.46065
		21.77	6.28	3.49742
		21.8	6.16	3.39742
		21.83	6.23	3.41806
		21.87	6.02	3.33097
		21.9	6.05	3.28839
		21.93	6.1	3.22258
		21.97	5.92	3.11355
		22	5.91	3.07097
		22.03	5.88	3.02903
		22.07	5.81	3.00323
		22.1	5.75	2.85226
		22.13	5.75	2.77613
		22.17	5.88	2.77871
		22.2	5.76	2.72323
		22.23	5.85	2.68645
		22.27	5.6	2.64
		22.3	5.77	2.60516
		22.33	5.74	2.59613
		22.37	5.81	2.60516
		22.4	5.88	2.57871
		22.43	5.9	2.52452
		22.47	5.82	2.54581
		22.5	5.94	2.52839
		22.53	5.9	2.43613
		22.57	5.93	2.51226
		22.6	5.96	2.50065
		22.63	5.87	2.40839
		22.67	5.96	2.49871
		22.7	6.02	2.44774
		22.73	6.14	2.45226
		22.77	6.18	2.41871
		22.8	6.09	2.37871
		22.83	6.02	2.36903
		22.87	6.08	2.45355
		22.9	6.04	2.54516
		22.93	6.09	2.55161
		22.97	5.97	2.54452
		23	5.86	2.5129
		23.03	5.82	2.44258
		23.07	5.83	2.48194
		23.1	5.83	2.42968
		23.13	5.92	2.41097
		23.16	5.88	2.43935
		23.2	5.88	2.43032
		23.23	5.92	2.41871
		23.26	6.07	2.45935
		23.3	6.03	2.50774
		23.33	6.15	2.54839
		23.36	6.16	2.57355
		23.4	6.27	2.60129
		23.43	6.36	2.63548
		23.46	6.49	2.71677
		23.5	6.62	2.78323
		23.53	6.7	2.84129
		23.56	6.85	2.97935
		23.6	7.07	3.06194
		23.63	7.3	3.12129
		23.66	7.57	3.29548
		23.7	7.94	3.43742
		23.73	8.34	3.51613
		23.76	8.61	3.6271
		23.8	8.96	3.73935
		23.83	9.42	3.95548
		23.86	9.97	4.26968
		23.9	10.52	4.43484
		23.93	11.06	4.68774
		23.96	11.61	4.86516
		24	11.96	5.04774
		24.03	12.67	5.23871
		24.06	13.22	5.43806
		24.1	13.58	5.59806
		24.13	13.91	5.76516
		24.16	14.19	5.89226
		24.2	14.38	5.99935
		24.23	14.49	6.09806
		24.26	14.65	6.16323
		24.3	14.67	6.24645
		24.33	14.66	6.24968
		24.36	14.59	6.23871
		24.4	14.47	6.11161
		24.43	14.08	6.02839
		24.46	13.82	5.91677
		24.5	13.49	5.76774
		24.53	12.96	5.5871
		24.56	12.59	5.29097
		24.6	11.94	5.05419
		24.63	11.25	4.75226
		24.66	10.79	4.56
		24.7	10.2	4.33097
		24.73	9.6	4.10903
		24.76	9.2	3.82129
		24.8	8.65	3.52129
		24.83	8.21	3.36387
		24.86	7.77	3.13161
		24.9	7.38	3.08065
		24.93	6.93	2.89032
		24.96	6.61	2.74387
		25	6.45	2.59032
		25.03	6.17	2.60903
		25.06	5.86	2.43871
		25.1	5.68	2.35613
		25.13	5.65	2.31161
		25.16	5.44	2.26194
		25.2	5.37	2.17355
		25.23	5.31	2.16968
		25.26	5.23	2.12774
		25.3	5.32	2.09613
		25.33	5.17	2.14968
		25.36	5.07	2.08258
		25.39	5.12	2.08645
		25.43	5.09	2.11613
		25.46	5.05	2.02387
		25.49	5.02	2.0471
		25.53	5.08	2.02968
		25.56	5.03	2.01355
		25.59	5	2.0271
		25.63	5.1	2.04839
		25.66	4.89	2.01935
		25.69	4.94	2.00968
		25.73	4.99	1.90452
		25.76	4.91	1.98323
		25.79	4.96	2.05097
		25.83	5.03	2.02258
		25.86	4.98	1.93871
		25.89	4.88	1.95419
		25.93	4.96	2.0271
		25.96	4.95	2.06129
		25.99	4.85	2.04645
		26.03	4.95	2.0729
		26.06	4.85	2.01548
		26.09	4.77	2.04387
		26.13	4.69	2.03677
		26.16	4.75	2.02645
		26.19	4.79	1.93935
		26.23	4.75	1.94774
		26.26	4.71	1.85871
		26.29	4.76	1.89484
		26.33	4.98	1.89161
		26.36	4.72	1.90839
		26.39	4.82	1.91935
		26.43	4.85	1.91161
		26.46	4.76	1.92839
		26.49	4.77	1.88258
		26.53	4.86	1.86065
		26.56	4.83	1.91806
		26.59	4.77	1.95806
		26.63	4.87	1.94452
		26.66	4.8	1.84516
		26.69	4.71	1.93161
		26.73	4.83	1.92065
		26.76	4.88	1.99161
		26.79	4.9	1.95548
		26.83	4.89	1.9671
		26.86	4.99	1.93935
		26.89	4.99	1.9071
		26.93	4.98	1.94839
		26.96	4.97	1.95484
		26.99	4.97	1.96129
		27.03	4.97	1.92452
		27.06	4.88	1.86
		27.09	4.86	1.91935
		27.13	4.78	1.98387
		27.16	4.76	1.91677
		27.19	4.76	1.96774
		27.23	4.78	1.90968
		27.26	4.75	1.94129
		27.29	4.77	1.89355
		27.33	4.7	1.90258
		27.36	4.81	1.93032
		27.39	4.78	1.88968
		27.43	4.68	1.86194
		27.46	4.6	1.88903
		27.49	4.75	1.84774
		27.52	4.73	1.90065
		27.56	4.75	1.88323
		27.59	4.75	1.83806
		27.62	4.76	1.84323
		27.66	4.69	1.82194
		27.69	4.8	1.89677
		27.72	4.74	1.87032
		27.76	4.7	1.89419
		27.79	4.76	1.94774
		27.82	4.78	1.89355
		27.86	4.74	1.89742
		27.89	4.79	1.91032
		27.92	4.72	2.08839
		27.96	4.74	1.96516
		27.99	4.76	2.05935
		28.02	4.85	2.03548
		28.06	4.76	2.05548
		28.09	4.76	1.99871
		28.12	4.77	1.96903
		28.16	4.74	2.00903
		28.19	4.72	2
		28.22	4.62	1.97613
		28.26	4.54	1.89871
		28.29	4.71	1.89548
		28.32	4.7	1.93355
		28.36	4.69	1.92645
		28.39	4.7	1.88258
		28.42	4.61	1.88903
		28.46	4.61	1.92387
		28.49	4.61	1.84129
		28.52	4.74	1.90645
		28.56	4.7	1.90839
		28.59	4.74	1.91355
		28.62	4.68	1.90839
		28.66	4.61	1.93032
		28.69	4.7	1.90968
		28.72	4.74	1.8929
		28.76	4.7	1.85161
		28.79	4.75	1.90452
		28.82	4.62	1.97871
		28.86	4.76	1.94065
		28.89	4.84	1.88452
		28.92	4.79	1.92194
		28.96	4.81	1.88
		28.99	4.82	1.93548
		29.02	4.67	1.95161
		29.06	4.83	1.95032
		29.09	4.84	1.91548
		29.12	4.8	1.99613
		29.16	4.75	1.88968
		29.19	4.61	1.94968
		29.22	4.64	1.9271
		29.26	4.61	1.87548
		29.29	4.71	1.88839
		29.32	4.8	1.86258
		29.36	4.68	1.85871
		29.39	4.73	1.91097
		29.42	4.62	1.87484
		29.46	4.65	1.87032
		29.49	4.68	1.84258
		29.52	4.81	1.89032
		29.56	4.79	1.87935
		29.59	4.74	1.82
		29.62	4.61	1.86968
		29.66	4.66	1.91032
		29.69	4.73	1.89806
		29.72	4.89	1.78
		29.75	4.78	1.84129
		29.79	4.79	1.8871
		29.82	4.72	1.90774
		29.85	4.7	1.89226
		29.89	4.92	1.78968
		29.92	4.9	1.89613
		29.95	4.89	1.8871
