# Supplementary material for: Cardiolipin targets a dynamin-related protein to the nuclear membrane
Source: eLife. 2021 Mar 4;10:e64416. doi: 10.7554/eLife.64416 (PMC7946437; doi:10.7554/eLife.64416)
Supplement: Figure 6—source data 1. [file elife-64416-fig6-data1.xlsx]

## Sheet: Fig 6c
		Elution volume	Drp6-I553A
		(ml)	mAU
		0	-0.004
		0.03	0.227
		0.07	0.247
		0.1	0.148
		0.13	0.093
		0.17	0.189
		0.2	2.916
		0.23	12.687
		0.27	15.077
		0.3	15.318
		0.33	9.79
		0.37	6.186
		0.4	4.181
		0.43	3.05
		0.47	2.371
		0.5	1.733
		0.53	1.512
		0.57	1.525
		0.6	1.251
		0.63	1.04
		0.67	0.877
		0.7	0.732
		0.73	0.695
		0.77	0.632
		0.8	0.55
		0.83	0.467
		0.87	0.583
		0.9	0.49
		0.93	0.346
		0.97	0.286
		1	0.331
		1.03	0.296
		1.07	0.391
		1.1	0.216
		1.13	0.258
		1.16	0.295
		1.2	0.269
		1.23	0.207
		1.26	0.164
		1.3	0.072
		1.33	0.233
		1.36	0.318
		1.4	0.374
		1.43	0.356
		1.46	0.34
		1.5	0.322
		1.53	0.282
		1.56	0.389
		1.6	0.309
		1.63	0.269
		1.66	0.173
		1.7	0.062
		1.73	0.13
		1.76	0.023
		1.8	0.099
		1.83	0.075
		1.86	0.099
		1.9	0.013
		1.93	0.065
		1.96	0.085
		2	-0.012
		2.03	-0.001
		2.06	-0.021
		2.1	0.07
		2.13	0.029
		2.16	0.182
		2.2	0.008
		2.23	0.131
		2.26	0.215
		2.3	0.022
		2.33	0.024
		2.36	0.024
		2.4	0.168
		2.43	0.177
		2.46	0.132
		2.5	0.089
		2.53	0.119
		2.56	0.13
		2.6	0.159
		2.63	0.232
		2.66	0.165
		2.7	0.143
		2.73	0.021
		2.76	0.072
		2.8	0.084
		2.83	0.04
		2.86	-0.099
		2.9	-0.066
		2.93	0.001
		2.96	0.027
		3	-0.03
		3.03	-0.018
		3.06	0.025
		3.1	-0.033
		3.13	-0.058
		3.16	0.045
		3.2	-0.025
		3.23	-0.004
		3.26	0.029
		3.3	0.264
		3.33	0.728
		3.36	0.613
		3.39	0.847
		3.43	0.532
		3.46	0.461
		3.49	0.285
		3.53	0.296
		3.56	0.33
		3.59	0.327
		3.63	0.321
		3.66	0.273
		3.69	0.157
		3.73	0.139
		3.76	0.109
		3.79	-0.006
		3.83	-0.001
		3.86	-0.099
		3.89	-0.043
		3.93	-0.012
		3.96	0.022
		3.99	-0.061
		4.03	-0.115
		4.06	-0.04
		4.09	-0.053
		4.13	-0.078
		4.16	-0.07
		4.19	-0.067
		4.23	-0.073
		4.26	0.096
		4.29	0.097
		4.33	0.031
		4.36	0.066
		4.39	-0.043
		4.43	0.048
		4.46	0.113
		4.49	0.067
		4.53	0.023
		4.56	0.17
		4.59	0.046
		4.63	0.019
		4.66	0.079
		4.69	0.202
		4.73	0.406
		4.76	0.552
		4.79	0.424
		4.83	0.278
		4.86	0.083
		4.89	0.096
		4.93	-0.021
		4.96	0.099
		4.99	0.056
		5.03	0.057
		5.06	0.039
		5.09	0.037
		5.13	-0.004
		5.16	-0.041
		5.19	-0.033
		5.23	0.036
		5.26	0.022
		5.29	0.057
		5.33	-0.01
		5.36	0.007
		5.39	-0.014
		5.43	-0.032
		5.46	0.111
		5.49	0.232
		5.52	0.219
		5.56	0.156
		5.59	0.187
		5.62	0.22
		5.66	0.175
		5.69	0.164
		5.72	0.114
		5.76	0.09
		5.79	-0.044
		5.82	-0.018
		5.86	-0.019
		5.89	-0.081
		5.92	-0.16
		5.96	-0.053
		5.99	0.068
		6.02	0.103
		6.06	0.044
		6.09	-0.044
		6.12	0.022
		6.16	0.14
		6.19	0.157
		6.22	0.233
		6.26	0.269
		6.29	0.268
		6.32	0.497
		6.36	0.617
		6.39	0.609
		6.42	0.747
		6.46	0.951
		6.49	1.121
		6.52	1.408
		6.56	1.629
		6.59	1.888
		6.62	2.212
		6.66	2.623
		6.69	3.056
		6.72	3.695
		6.76	4.275
		6.79	5.029
		6.82	5.879
		6.86	6.801
		6.89	8.073
		6.92	9.494
		6.96	11.312
		6.99	13.405
		7.02	16.161
		7.06	19.34
		7.09	23.519
		7.12	28.611
		7.16	34.833
		7.19	42.42
		7.22	51.35
		7.26	62.074
		7.29	73.593
		7.32	86.951
		7.36	100.423
		7.39	115.441
		7.42	130.209
		7.46	145.48
		7.49	159.574
		7.52	173.48
		7.56	184.791
		7.59	194.628
		7.62	201.639
		7.66	205.895
		7.69	207.294
		7.72	205.863
		7.75	201.736
		7.79	194.881
		7.82	186.16
		7.85	175.408
		7.89	163.426
		7.92	150.655
		7.95	137.187
		7.99	123.748
		8.02	110.348
		8.05	98.239
		8.09	86.573
		8.12	76.766
		8.15	67.917
		8.19	60.498
		8.22	54.071
		8.25	48.997
		8.29	44.67
		8.32	41.278
		8.35	38.202
		8.39	35.784
		8.42	33.611
		8.45	31.703
		8.49	30.079
		8.52	28.72
		8.55	27.573
		8.59	26.398
		8.62	25.463
		8.65	24.481
		8.69	23.624
		8.72	22.832
		8.75	22.367
		8.79	21.578
		8.82	21.107
		8.85	20.521
		8.89	20.033
		8.92	19.686
		8.95	19.216
		8.99	19.014
		9.02	18.57
		9.05	18.421
		9.09	18.006
		9.12	17.639
		9.15	17.655
		9.19	17.335
		9.22	17.2
		9.25	17.033
		9.29	16.747
		9.32	16.573
		9.35	16.443
		9.39	16.374
		9.42	16.29
		9.45	15.968
		9.49	15.712
		9.52	15.753
		9.55	15.734
		9.59	15.641
		9.62	15.477
		9.65	15.285
		9.69	15.157
		9.72	15.012
		9.75	14.927
		9.79	14.727
		9.82	14.539
		9.85	14.337
		9.89	14.101
		9.92	14.049
		9.95	13.909
		9.98	13.853
		10.02	13.896
		10.05	13.849
		10.08	13.806
		10.12	13.787
		10.15	13.826
		10.18	13.936
		10.22	13.989
		10.25	14.214
		10.28	14.387
		10.32	14.495
		10.35	14.901
		10.38	15.211
		10.42	15.558
		10.45	16.047
		10.48	16.465
		10.52	16.927
		10.55	17.586
		10.58	18.172
		10.62	18.792
		10.65	19.235
		10.68	19.819
		10.72	20.39
		10.75	20.858
		10.78	21.313
		10.82	21.629
		10.85	21.945
		10.88	21.991
		10.92	22.258
		10.95	22.192
		10.98	22.234
		11.02	22.154
		11.05	21.887
		11.08	21.727
		11.12	21.382
		11.15	21.125
		11.18	20.658
		11.22	20.38
		11.25	19.846
		11.28	19.516
		11.32	19.077
		11.35	18.781
		11.38	18.332
		11.42	17.971
		11.45	17.541
		11.48	17.183
		11.52	16.892
		11.55	16.497
		11.58	16.318
		11.62	16.155
		11.65	15.845
		11.68	15.564
		11.72	15.343
		11.75	15.176
		11.78	15.084
		11.82	14.743
		11.85	14.654
		11.88	14.371
		11.92	14.237
		11.95	14.144
		11.98	14.1
		12.02	14.006
		12.05	13.958
		12.08	13.995
		12.11	14.002
		12.15	14.115
		12.18	14.121
		12.21	14.154
		12.25	14.283
		12.28	14.362
		12.31	14.532
		12.35	14.659
		12.38	14.593
		12.41	14.788
		12.45	14.939
		12.48	15.067
		12.51	14.954
		12.55	15.17
		12.58	15.235
		12.61	15.309
		12.65	15.482
		12.68	15.431
		12.71	15.387
		12.75	15.557
		12.78	15.473
		12.81	15.511
		12.85	15.529
		12.88	15.334
		12.91	15.322
		12.95	15.41
		12.98	15.218
		13.01	15.218
		13.05	15.346
		13.08	15.209
		13.11	15.156
		13.15	15.387
		13.18	15.13
		13.21	15.411
		13.25	15.286
		13.28	15.169
		13.31	15.18
		13.35	15.158
		13.38	15.14
		13.41	15.115
		13.45	15.143
		13.48	15.044
		13.51	14.878
		13.55	14.733
		13.58	14.657
		13.61	14.205
		13.65	14.269
		13.68	14.001
		13.71	13.732
		13.75	13.545
		13.78	13.107
		13.81	12.805
		13.85	12.543
		13.88	12.195
		13.91	11.892
		13.95	11.582
		13.98	11.297
		14.01	11.001
		14.05	10.729
		14.08	10.565
		14.11	10.502
		14.15	10.325
		14.18	10.345
		14.21	10.238
		14.25	10.146
		14.28	10.124
		14.31	10.089
		14.34	10.072
		14.38	10.099
		14.41	10.115
		14.44	10.129
		14.48	10.216
		14.51	10.135
		14.54	10.306
		14.58	10.315
		14.61	10.392
		14.64	10.486
		14.68	10.655
		14.71	10.715
		14.74	10.883
		14.78	10.852
		14.81	10.838
		14.84	11.057
		14.88	11.188
		14.91	11.319
		14.94	11.64
		14.98	11.786
		15.01	11.956
		15.04	12.051
		15.08	12.399
		15.11	12.639
		15.14	12.923
		15.18	13.248
		15.21	13.467
		15.24	13.737
		15.28	14.064
		15.31	14.288
		15.34	14.442
		15.38	14.704
		15.41	14.781
		15.44	14.887
		15.48	14.926
		15.51	15.032
		15.54	14.947
		15.58	14.724
		15.61	14.568
		15.64	14.422
		15.68	14.422
		15.71	14.246
		15.74	14.089
		15.78	13.887
		15.81	13.772
		15.84	13.864
		15.88	13.897
		15.91	13.542
		15.94	13.055
		15.98	12.735
		16.01	12.435
		16.04	12.359
		16.08	12.051
		16.11	11.837
		16.14	11.815
		16.18	11.7
		16.21	11.63
		16.24	11.521
		16.28	11.42
		16.31	11.456
		16.34	11.447
		16.38	11.355
		16.41	11.318
		16.44	11.34
		16.48	11.243
		16.51	11.35
		16.54	11.482
		16.57	11.461
		16.61	11.442
		16.64	11.441
		16.67	11.319
		16.71	11.429
		16.74	11.558
		16.77	11.366
		16.81	11.284
		16.84	11.308
		16.87	11.026
		16.91	10.893
		16.94	10.83
		16.97	10.453
		17.01	10.268
		17.04	10.145
		17.07	9.74
		17.11	9.567
		17.14	9.309
		17.17	9.004
		17.21	8.729
		17.24	8.491
		17.27	8.211
		17.31	7.972
		17.34	7.901
		17.37	7.615
		17.41	7.342
		17.44	7.302
		17.47	7.031
		17.51	6.798
		17.54	6.768
		17.57	6.641
		17.61	6.481
		17.64	6.386
		17.67	6.316
		17.71	6.27
		17.74	6.346
		17.77	6.349
		17.81	6.305
		17.84	6.312
		17.87	6.217
		17.91	6.328
		17.94	6.259
		17.97	6.323
		18.01	6.258
		18.04	6.167
		18.07	6.217
		18.11	6.23
		18.14	6.33
		18.17	6.349
		18.21	6.467
		18.24	6.505
		18.27	6.576
		18.31	6.653
		18.34	6.771
		18.37	6.838
		18.41	6.864
		18.44	6.966
		18.47	7.011
		18.51	7.122
		18.54	7.245
		18.57	7.415
		18.61	7.522
		18.64	7.44
		18.67	7.431
		18.71	7.58
		18.74	7.636
		18.77	7.755
		18.8	7.761
		18.84	7.739
		18.87	7.828
		18.9	7.855
		18.94	7.78
		18.97	7.811
		19	7.803
		19.04	7.809
		19.07	7.795
		19.1	7.71
		19.14	7.753
		19.17	7.679
		19.2	7.731
		19.24	7.582
		19.27	7.531
		19.3	7.523
		19.34	7.413
		19.37	7.378
		19.4	7.284
		19.44	7.222
		19.47	7.279
		19.5	7.304
		19.54	7.182
		19.57	7.149
		19.6	7.193
		19.64	7.076
		19.67	7.094
		19.7	7.038
		19.74	6.982
		19.77	7.017
		19.8	7.013
		19.84	7.026
		19.87	6.923
		19.9	6.85
		19.94	6.879
		19.97	6.749
		20	6.649
		20.04	6.438
		20.07	6.235
		20.1	6.172
		20.14	6.096
		20.17	5.864
		20.2	5.931
		20.24	5.717
		20.27	5.725
		20.3	5.58
		20.34	5.562
		20.37	5.503
		20.4	5.423
		20.44	5.302
		20.47	5.359
		20.5	5.241
		20.54	5.297
		20.57	5.17
		20.6	5.218
		20.64	5.274
		20.67	5.334
		20.7	5.221
		20.74	5.382
		20.77	5.236
		20.8	5.437
		20.84	5.498
		20.87	5.477
		20.9	5.489
		20.93	5.578
		20.97	5.518
		21	5.53
		21.03	5.756
		21.07	5.66
		21.1	5.775
		21.13	5.671
		21.17	5.775
		21.2	5.866
		21.23	5.803
		21.27	5.93
		21.3	5.812
		21.33	5.96
		21.37	5.913
		21.4	5.975
		21.43	6.003
		21.47	6.058
		21.5	5.894
		21.53	6.026
		21.57	5.876
		21.6	5.857
		21.63	5.693
		21.67	5.668
		21.7	5.495
		21.73	5.364
		21.77	5.421
		21.8	5.266
		21.83	5.298
		21.87	5.163
		21.9	5.097
		21.93	4.995
		21.97	4.826
		22	4.76
		22.03	4.695
		22.07	4.655
		22.1	4.421
		22.13	4.303
		22.17	4.307
		22.2	4.221
		22.23	4.164
		22.27	4.092
		22.3	4.038
		22.33	4.024
		22.37	4.038
		22.4	3.997
		22.43	3.913
		22.47	3.946
		22.5	3.919
		22.53	3.776
		22.57	3.894
		22.6	3.876
		22.63	3.733
		22.67	3.873
		22.7	3.794
		22.73	3.801
		22.77	3.749
		22.8	3.687
		22.83	3.672
		22.87	3.803
		22.9	3.945
		22.93	3.955
		22.97	3.944
		23	3.895
		23.03	3.786
		23.07	3.847
		23.1	3.766
		23.13	3.737
		23.16	3.781
		23.2	3.767
		23.23	3.749
		23.26	3.812
		23.3	3.887
		23.33	3.95
		23.36	3.989
		23.4	4.032
		23.43	4.085
		23.46	4.211
		23.5	4.314
		23.53	4.404
		23.56	4.618
		23.6	4.746
		23.63	4.838
		23.66	5.108
		23.7	5.328
		23.73	5.45
		23.76	5.622
		23.8	5.796
		23.83	6.131
		23.86	6.618
		23.9	6.874
		23.93	7.266
		23.96	7.541
		24	7.824
		24.03	8.12
		24.06	8.429
		24.1	8.677
		24.13	8.936
		24.16	9.133
		24.2	9.299
		24.23	9.452
		24.26	9.553
		24.3	9.682
		24.33	9.687
		24.36	9.67
		24.4	9.473
		24.43	9.344
		24.46	9.171
		24.5	8.94
		24.53	8.66
		24.56	8.201
		24.6	7.834
		24.63	7.366
		24.66	7.068
		24.7	6.713
		24.73	6.369
		24.76	5.923
		24.8	5.458
		24.83	5.214
		24.86	4.854
		24.9	4.775
		24.93	4.48
		24.96	4.253
		25	4.015
		25.03	4.044
		25.06	3.78
		25.1	3.652
		25.13	3.583
		25.16	3.506
		25.2	3.369
		25.23	3.363
		25.26	3.298
		25.3	3.249
		25.33	3.332
		25.36	3.228
		25.39	3.234
		25.43	3.28
		25.46	3.137
		25.49	3.173
		25.53	3.146
		25.56	3.121
		25.59	3.142
		25.63	3.175
		25.66	3.13
		25.69	3.115
		25.73	2.952
		25.76	3.074
		25.79	3.179
		25.83	3.135
		25.86	3.005
		25.89	3.029
		25.93	3.142
		25.96	3.195
		25.99	3.172
		26.03	3.213
		26.06	3.124
		26.09	3.168
		26.13	3.157
		26.16	3.141
		26.19	3.006
		26.23	3.019
		26.26	2.881
		26.29	2.937
		26.33	2.932
		26.36	2.958
		26.39	2.975
		26.43	2.963
		26.46	2.989
		26.49	2.918
		26.53	2.884
		26.56	2.973
		26.59	3.035
		26.63	3.014
		26.66	2.86
		26.69	2.994
		26.73	2.977
		26.76	3.087
		26.79	3.031
		26.83	3.049
		26.86	3.006
		26.89	2.956
		26.93	3.02
		26.96	3.03
		26.99	3.04
		27.03	2.983
		27.06	2.883
		27.09	2.975
		27.13	3.075
		27.16	2.971
		27.19	3.05
		27.23	2.96
		27.26	3.009
		27.29	2.935
		27.33	2.949
		27.36	2.992
		27.39	2.929
		27.43	2.886
		27.46	2.928
		27.49	2.864
		27.52	2.946
		27.56	2.919
		27.59	2.849
		27.62	2.857
		27.66	2.824
		27.69	2.94
		27.72	2.899
		27.76	2.936
		27.79	3.019
		27.82	2.935
		27.86	2.941
		27.89	2.961
		27.92	3.237
		27.96	3.046
		27.99	3.192
		28.02	3.155
		28.06	3.186
		28.09	3.098
		28.12	3.052
		28.16	3.114
		28.19	3.1
		28.22	3.063
		28.26	2.943
		28.29	2.938
		28.32	2.997
		28.36	2.986
		28.39	2.918
		28.42	2.928
		28.46	2.982
		28.49	2.854
		28.52	2.955
		28.56	2.958
		28.59	2.966
		28.62	2.958
		28.66	2.992
		28.69	2.96
		28.72	2.934
		28.76	2.87
		28.79	2.952
		28.82	3.067
		28.86	3.008
		28.89	2.921
		28.92	2.979
		28.96	2.914
		28.99	3
		29.02	3.025
		29.06	3.023
		29.09	2.969
		29.12	3.094
		29.16	2.929
		29.19	3.022
		29.22	2.987
		29.26	2.907
		29.29	2.927
		29.32	2.887
		29.36	2.881
		29.39	2.962
		29.42	2.906
		29.46	2.899
		29.49	2.856
		29.52	2.93
		29.56	2.913
		29.59	2.821
		29.62	2.898
		29.66	2.961
		29.69	2.942
		29.72	2.759
		29.75	2.854
		29.79	2.925
		29.82	2.957
		29.85	2.933
		29.89	2.774
		29.92	2.939
		29.95	2.925

## Sheet: Fig 6d
Phosphate release
(nmol)		WT	I553A
	Replicate 1	1.60524	1.58304
	Replicate 2	1.54603	1.54603
	Replicate 3	1.56824	1.56824
	Mean	1.57317	1.56577
	SD	0.0244215	0.0152073

## Sheet: Fig 6e
		Phosphate Release
		nmol				Drp6							I553A-Drp6
	Time(min)		Time (min)	Replicate 1	Replicate 2	Replicate 3	Mean	SD			Replicate 1	Replicate 2	Replicate 3	Mean	SD
	0		0	0	0	0	0	0			0	0	0	0	0
	5		5	0.388	0.443	0.436	0.422333	0.0244449			0.416	0.365	0.378	0.386333	0.0216384
	10		10	0.732	0.673	0.718	0.707667	0.0251705			0.702	0.634	0.63	0.655333	0.0330387
	20		20	1.08	1.13	1.15	1.12	0.0294392			1.14	0.98	1.16	1.09333	0.0805536

## Sheet: Fig 6f
		MRE
Wavelength(nm)	Drp6	I553M-Drp6	I553A-Drp6
320	355.526	117.884	100.258
319	370.456	102.666	128.55
318	246.201	112.246	144.506
317	161.924	-34.2228	166.424
316	190.182	44.3062	181.657
315	208.819	40.9154	316.66
314	232.255	9.83779	260.121
313	201.104	-19.3001	288.167
312	149.487	-74.0095	315.972
311	110.311	-140.657	326.3
310	242.149	-46.8188	375.955
309	263.706	-36.3647	426.113
308	272.884	76.2673	452.704
307	185.724	-56.2916	297.978
306	215.972	-63.1401	257.649
305	155.405	-157.793	219.098
304	41.9211	-161.839	168.018
303	108.022	-44.4664	87.0097
302	147.257	-34.6789	94.7958
301	297.099	57.6722	132.987
300	356.901	100.474	214.628
299	295.488	-21.3074	187.332
298	378.451	139.467	158.87
297	211.701	26.0431	278.204
296	295.523	206.866	213.392
295	252.69	61.7104	179.601
294	374.967	-30.374	133.617
293	310.683	-38.3438	154.686
292	261.771	-118.732	241.257
291	340.067	-52.1471	311.275
290	289.099	-83.5128	327.231
289	362.645	-43.731	319.676
288	254.674	-4.81874	316.652
287	214.951	-77.9754	320.705
286	174.913	42.9381	352.361
285	198.044	-19.7697	311.266
284	313.192	86.3056	376.634
283	358.188	50.8816	266.357
282	308.504	51.4452	293.403
281	250.601	13.3456	314.984
280	214.543	-45.6266	286.306
279	356.714	-67.5109	369.752
278	454.526	-28.5826	485.313
277	449.231	-114.538	436.406
276	463.496	-132.146	359.841
275	447.069	-138.566	309.938
274	411.04	-9.99598	266.146
273	415.563	161.823	295.309
272	413.897	170.867	287.769
271	492.757	153.8	219.843
270	488.254	42.8942	245.516
269	459.651	-16.773	349.793
268	453.298	-2.23103	457.98
267	480.469	61.3924	507.639
266	484.304	40.7293	420.155
265	569.92	203.348	369.029
264	521.27	227.688	432.468
263	374.767	148.624	541.53
262	362.406	1.39422	535.764
261	367.874	-109.451	512.387
260	498.904	-77.0339	374.136
259	487.965	53.2836	329.459
258	457.584	77.752	403.521
257	365.899	87.2949	364.515
256	415.798	-17.9259	414.348
255	449.898	-95.7634	406.054
254	457.903	-129.529	352.453
253	375.776	-58.9836	406.373
252	260.385	-16.8682	348.271
251	230.279	-150.811	415.738
250	160.746	-262.182	388.063
249	129.961	-296.458	494.3
248	224.424	-248.134	469.414
247	161.776	-364.28	432.357
246	2.9366	-546.443	225.384
245	-115.181	-662.334	-32.6792
244	-211.714	-749.758	-172.872
243	-342.491	-766.463	-417.404
242	-526.401	-874.66	-562.19
241	-881.806	-1168.4	-976.524
240	-1201.42	-1563.78	-1271
239	-1584.12	-1845.47	-1531.38
238	-2071.75	-2253.14	-1963.89
237	-2642.1	-2672.61	-2429.13
236	-3190.34	-3298.71	-3104.09
235	-3826.72	-3883.81	-3725.41
234	-4377.3	-4594.16	-4490.31
233	-5028.92	-5267.22	-5254.25
232	-5619.88	-5901.18	-6043.21
231	-6415.95	-6759.77	-6879.18
230	-7384.47	-7657.3	-7708.37
229	-8159.36	-8434.71	-8682.34
228	-9019.54	-9250.4	-9263.68
227	-9628.13	-9715.02	-9822.28
226	-10159.6	-10226.9	-10447.1
225	-10596.7	-10652	-10929
224	-11124.7	-11109.7	-11287
223	-11269.1	-11284.9	-11298.9
222	-11452.1	-11386.1	-11423.8
221	-11347.6	-11144.1	-11341.3
220	-11177.8	-10887	-11282.6
219	-10951.8	-10606.2	-10775.1
218	-10618.2	-10369.8	-10311.4
217	-10199.9	-9807.84	-9500.41
216	-9889.27	-9386.27	-8872.47
215	-9267.02	-8388.54	-7982.31
214	-8472.21	-7690.89	-7144.47
213	-7491.33	-6801.06	-6007.1
212	-6671.25	-6211.18	-4913.77
211	-5413.01	-5258.69	-3435.86
210	-4595.33	-4380.84	-2619.88
209	-3182.1	-3042.54	-1482.43
208	-2258.77	-2010.17	-1162.06
207	-1146.44	-1018.2	-1017.06
206	-638.764	-475.921	-899.906
205	-247.48	-129.834	-595.298

## Sheet: Fig 6g
		cps
Wavelength (nm)	WT	I553M	I553A
310	307990	317781	320729
310.5	312329	321234	325465
311	316796	325932	334185
311.5	323044	335320	340195
312	334834	341106	346127
312.5	341868	347881	355702
313	347491	356582	364217
313.5	357458	366070	373210
314	363975	376269	381268
314.5	374061	384354	395016
315	378805	390113	396884
315.5	389444	399980	409142
316	398356	406822	419301
316.5	406397	418392	426137
317	414187	426783	436770
317.5	426661	434073	445600
318	431228	445248	453944
318.5	439979	454295	463223
319	448759	460381	470770
319.5	455339	469937	475979
320	469090	479027	491055
320.5	472582	487999	496547
321	485192	496111	506223
321.5	488808	505869	513747
322	501667	513622	521634
322.5	507361	519129	531899
323	518267	526005	538948
323.5	523099	537775	544699
324	534299	541459	551532
324.5	539879	548152	557336
325	547819	559081	567644
325.5	551315	564888	569462
326	553546	565952	574457
326.5	561567	571721	576407
327	563519	580515	585107
327.5	570998	578569	588427
328	572753	583850	594220
328.5	576988	594534	594110
329	579404	589761	599889
329.5	579790	596226	604276
330	580103	596962	606945
330.5	580909	602250	610227
331	581940	605142	615144
331.5	583875	607245	613346
332	589197	608309	617683
332.5	578323	603498	615232
333	586829	609112	622607
333.5	587488	609194	621155
334	585203	608490	618352
334.5	588037	611243	624052
335	585297	612567	622326
335.5	587226	612119	624293
336	585802	608183	620090
336.5	587994	609588	623142
337	585344	607705	617486
337.5	583810	608350	618711
338	587415	604409	618452
338.5	582679	604343	616050
339	582241	602219	615371
339.5	579615	601759	614115
340	579440	599846	609400
340.5	578860	597017	605010
341	577253	595475	603491
341.5	572780	588103	602645
342	570350	588803	599128
342.5	568506	584802	598248
343	568738	586766	594900
343.5	563296	580447	589430
344	561831	578118	587616
344.5	561566	577368	587362
345	560226	573177	583187
345.5	556109	571678	579444
346	552868	568183	578018
346.5	550134	563332	576843
347	544636	557739	570648
347.5	544862	557621	566016
348	539908	553829	563588
348.5	537645	547325	559198
349	530242	545130	552348
349.5	530185	542035	550164
350	524057	535819	545557
350.5	523129	532177	542715
351	520080	526604	540544
351.5	515843	524985	536102
352	512190	520428	529262
352.5	507682	516455	527731
353	504862	513746	524048
353.5	500330	510996	517837
354	497513	504942	512410
354.5	494434	503950	509026
355	492480	497086	505320
355.5	486535	493106	503366
356	486141	490459	498429
356.5	480242	485166	495009
357	479130	483499	492264
357.5	478358	480037	489545
358	474560	476465	486198
358.5	471648	472394	479320
359	467320	469958	477248
359.5	466668	465904	476356
360	463918	463999	469597
360.5	460126	457572	469107
361	458521	455427	464240
361.5	455229	452402	462249
362	452745	451021	456812
362.5	449932	444160	455477
363	447804	442562	452366
363.5	449780	443026	452269
364	444786	439757	447698
364.5	442019	435525	445194
365	439335	432619	441061
365.5	437721	426852	436472
366	430746	426705	438654
366.5	432813	422959	431972
367	427252	420083	427700
367.5	425630	414098	426197
368	423572	411872	419422
368.5	419028	407677	416796
369	418266	404053	414873
369.5	412755	399664	411344
370	410283	397332	407383
370.5	406937	392637	403916
371	403834	388853	399237
371.5	401764	387094	396556
372	397955	382777	392510
372.5	394474	378093	390448
373	390851	372442	384616
373.5	388508	369506	381676
374	382218	363666	375828
374.5	380397	361124	371606
375	376333	357540	370937
375.5	373559	355890	366330
376	368047	350877	362116
376.5	364697	346083	358888
377	359871	340579	352421
377.5	358800	337945	349616
378	356129	333671	346575
378.5	352920	330979	343016
379	349696	325110	339491
379.5	344034	323839	336055
380	341525	321661	330565
380.5	339259	315984	330122
381	334916	315039	325722
381.5	331713	309765	321167
382	331478	307864	319403
382.5	326586	304894	316313
383	323261	302900	313728
383.5	320607	300387	309528
384	318539	294862	307712
384.5	313870	293200	304484
385	310571	289003	301199
385.5	307928	286448	297938
386	304511	283694	295884
386.5	302144	278820	291385
387	297476	276548	288861
387.5	295603	274246	283905
388	292136	270093	281077
388.5	288704	266941	278681
389	284363	261766	274530
389.5	280291	260782	270909
390	277547	257494	267068
390.5	274905	252073	264355
391	271195	250287	261632
391.5	267386	247671	257866
392	265573	244105	254244
392.5	260207	239393	251118
393	258401	236549	248856
393.5	253202	233530	246461
394	250070	229125	240261
394.5	248913	228332	239297
395	245584	226451	236625
395.5	241626	222511	232091
396	238421	220574	230927
396.5	235819	217331	226260
397	234027	213262	225830
397.5	231375	211980	222037
398	228382	209217	219775
398.5	225955	206765	216468
399	222553	204661	213728
399.5	218465	201017	211081
400	217916	198515	208396

## Sheet: Fig 6h
	WT				I553M				I553A
[Q] in mM	F	F0/F		[Q] in mM	F	F0/F		[Q] in mM	F	F0/F
0	157.111	1		0	191.109	1		0	176.921	1
50	135.48	1.15966		50	150.684	1.26827		50	154.546	1.14478
100	127.246	1.23471		100	145.296	1.3153		100	133.702	1.32325
150	112.626	1.39498		150	131.558	1.45266		150	123.513	1.4324
200	109.912	1.42943		200	117.099	1.63203		200	115.195	1.53583
250	89.0315	1.76467		250	110.469	1.72997		250	110.543	1.60048
300	83.5795	1.87978		300	98.8655	1.93302		300	93.0549	1.90125
350	78.6626	1.99728		350	90.9577	2.10108		350	88.681	1.99502
400	78.0189	2.01376		400	84.7806	2.25416		400	81.0321	2.18334
