# Supplementary material for: Cardiolipin targets a dynamin-related protein to the nuclear membrane
Source: eLife. 2021 Mar 4;10:e64416. doi: 10.7554/eLife.64416 (PMC7946437; doi:10.7554/eLife.64416)
Supplement: Figure 8—source data 1. [file elife-64416-fig8-data1.xlsx]

## Sheet: Fig 8a
				% MAC development
			Experiment 1	Experiment 2	Experiment 3	Mean	SD
		DMSO	70	75	68	71	2.94392
		PCP	25	22	25	24	1.41421
		NaO	30	26	28	28	1.63299

## Sheet: Fig 8b
			% MAC development
		Experiment 1	Experiment 2	Experiment 3	Mean	SD
	CUXB	75	80	70	75	4.08248
	DTD	2	4	3	3	0.816497
	ΔDTD	5	4	7	5.33333	1.24722
